# Supplementary material for: Detailed Molecular Dynamics of the Photochromic Reaction of Spiropyran: A Semiclassical Dynamics Study
Source: Hindawi journal article supplement (doi:10.1155/2014/541791), 2014-01-01
Supplement: f1 [file 541791.f1.doc]

Supporting Information

For

**Detailed dynamics of the photochromic reaction of spiropyran:**

**A semiclassical dynamics study**

Gaohong Zhai a,*, Shuai Shao a, Shaomei Wu a, Yibo Lei a,*, Yusheng Dou b

aKey Laboratory of Synthetic and Natural Functional Molecule Chemistry of Ministry of Education, The College of Chemistry & Materials Science, Shaanxi Key Laboratory of Physico-Inorganic Chemistry, Northwest University, Xi’an 710069, P. R. China

bDepartment of Physical Sciences, Nicholls State University, PO Box 2022, Thibodaux, LA 70310, U. S. A.

**Figure S1.** Changes in (a) the α, β and γ (b) C1−O bond length of mSPc subjected excitation by a 80 fs (FWHM) laser pulse with a fluence of 0.058 kJ/m2 and photon energy of 4.062 eV and excited state lifetime of 560 fs.

**Figure S2.** Changes in (a) C1−C3 bond length (b) the α, β and γ of mSPc subjected excitation by a 80 fs (FWHM) laser pulse with a fluence of 0.049 kJ/m2 and photon energy of 4.062 eV and excited state lifetime of 9615 fs.

**Figure S3.** Changes in (a) C1−N30 bond length (b) the α, β and γ of mSPc subjected excitation by a 80 fs (FWHM) laser pulse with a fluence of 0.063 kJ/m2 and photon energy of 4.062 eV and excited lifetime of 513 fs.

**Figure S4.** Changes in (a) C1−C2 bond length (b) the α, β and γ of mSPc subjected excitation by a 80 fs (FWHM) laser pulse with a fluence of 5.341kJ/m2 and photon energy of 4.062 eV and excited lifetime of 3020 fs.

**Figure S5.** Changes in (a) C1−C3 bond length (b) the α, β and γ of mSPc subjected excitation by a 80 fs (FWHM) laser pulse with a fluence of 5.341kJ/m2 and photon energy of 4.062 eV and excited lifetime of 3764 fs.

**Figure S6.** Changes in the α, β and γ of mSPc subjected excitation by a 80 fs (FWHM) laser pulse with a fluence of 9.088 kJ/m2 and photon energy of 4.062 eV and excited lifetime of 1500 fs.

**Figure S7.** Changes in the α, β and γ of mSPt subjected excitation by a 80 fs (FWHM) laser pulse with a fluence of 1.279 kJ/m2 and photon energy of 4.062 eV and excited lifetime of 382 fs.
